# Supplementary material for: Lactobacillus plantarum 69-2 combined with α-lactalbumin hydrolysate alleviates DSS-induced ulcerative colitis through the TLR4/NF-κB inflammatory pathway and the gut microbiota in mice
Source: Royal Society of Chemistry journal article supplement (doi:10.1039/d4fo02975e), 2024-01-01
Supplement: d4fo02975e1.pdf [file d4fo02975e1.pdf]

## Supporting Information

***Lactobacillus plantarum 69-2 combined with  $\alpha$ -lactalbumin hydrolysate alleviates  
DSS-induced ulcerative colitis by TLR4/NF- $\kappa$ B inflammatory pathway and gut  
microbiota in mice***

Yue Ma<sup>1,2</sup>, Chuanbing Hu<sup>1,2</sup>, Jing Zhang<sup>1,2</sup>, Cong Xu<sup>1,2</sup>, Lizhi Ma<sup>1,3</sup>, Yunhe Chang<sup>1,3</sup>, Muhammad Altaf Hussain<sup>4</sup>,

Jiage Ma<sup>2</sup>, Juncai Hou<sup>1,3\*</sup> and Zhanmei Jiang<sup>2\*\*</sup>

<sup>1</sup> College of Food Science and Engineering, Guiyang University, Guiyang, 550005, China

<sup>2</sup> College of Food Science, Northeast Agricultural University, Harbin, 150030, China

<sup>3</sup> Engineering Technology Research Center for Processing and Comprehensive Utilization of *Idesia polycarpa* of  
National Forestry and Grassland Administration, Guiyang, 550005, China

<sup>4</sup> Faculty of Veterinary and Animal Science Lasbela University of Agriculture Water and Marine Sciences,  
Balochistan, 90159, Pakistan

**\*Corresponding authors 1:** Juncai Hou, E-mail: houjuncai88@126com

**\*\* Corresponding authors 2:** Zhanmei Jiang, E-mail: zhanmeijiang@neau.edu.cn

Table S1.  $\alpha$ -LA enzymatic hydrolysis conditions

Table S2. DAI scoring standard

Table S3. Histopathological scoring criteria of the colon

Table S4. Primer sequence

Table.S5. Statistical table of different samples

Table S6. OTUs and Tags statistics for different samples

Figure S1. Effect of simulated gastrointestinal digestion on antioxidant capacity of  $\alpha$ -LA hydrolysate in vitro

Figure S2. PCA analysis of different treatment groups

Figure S3. PCoA analysis of different treatment groups

Figure S4. UPGMA clustering tree

Figure S5. Raw images of the Western blot in Figure 6.

Table S1.  $\alpha$ -LA enzymatic hydrolysis conditions

|                   | Temperature (°C) | pH  | Enzymatic hydrolysis time (h) | Enzyme substrate ratio |
|-------------------|------------------|-----|-------------------------------|------------------------|
| Alkaline protease | 50               | 10  | 5                             | 1 : 50                 |
| Neutral protease  | 50               | 7   | 5                             | 1 : 50                 |
| Papain            | 50               | 7.5 | 5                             | 1 : 50                 |

Table S2. DAI scoring standard

| DAI score | Weight loss rate (%) | Fecal state             | Hematochezia status                     |
|-----------|----------------------|-------------------------|-----------------------------------------|
| 0         | 0                    | Normal                  | No color in 2 min                       |
| 1         | 1-5                  | Loose                   | Light green turns to green after 10 sec |
| 2         | 6-10                 | Semi-formed with slime  | Light green gradually turns blue brown  |
| 3         | 11-15                | Loose stools            | Gradually turns bluish-brown            |
| 4         | >15                  | Watery stool with blood | Immediately turns bluish-brown          |

Note: Dead mice were scored 4 points for each item.

Table S3. Histopathological scoring criteria of the colon

| Extent of disease | Epithelial injury degree                             | Inflammatory infiltration                                                                     | Score |
|-------------------|------------------------------------------------------|-----------------------------------------------------------------------------------------------|-------|
| no lesion         | No obvious damage                                    | Non-infiltration                                                                              | 0     |
| 1-25%             | Goblet cells were absent                             | Infiltration around the base of crypt                                                         | 1     |
| 26%-50%           | 1/3 of the basal epithelium<br>crypts were destroyed | Infiltrate into muscularis mucosae                                                            | 2     |
| 51-75%            | 2/3 of the basal epithelium<br>crypts were destroyed | Infiltration into muscularis<br>mucosae accompanied by mucosal<br>thickening and marked edema | 3     |
| 76%-100%          | All basal epithelial crypts were<br>destroyed        | Infiltrating submucosa                                                                        | 4     |

Table S4. Primer sequence

| Gene           | Upstream Primers (5'-3')  | Downstream Primers (5'-3') |
|----------------|---------------------------|----------------------------|
| Claudin-1      | AACCCGAAACTGATGCTGTGGATAG | CGCCCTTGAATGTATGTGGAGAG    |
| ZO-1           | AACCCGAAACTGATGCTGTGGATAG | CGCCCTTGAATGTATGTGGAGAG    |
| MyD88          | AGCAGAACCAGGAGTCCGAGAAG   | GGGCAGTAGCAGATAAAGGCATCG   |
| TLR4           | GAGCCGGAAGGTTATTGTGGTAGTG | AGGACAATGAAGATGATGCCAGAGC  |
| Occludin       | CAACGGCAAAGTGAATGGCAAGAG  | TCATCCACGGACAAGGTCAGAGG    |
| p-p65          | GCGTCTTCCTCCACAGCCATTC    | TGTCTCTGTTGGATTGTGCCGAAC   |
| $\beta$ -actin | CTGAGAGGGAAATCGTGCGTGAC   | AGGAAGAGGATGCGGCAGTGG      |

Table S5. Statistical table of different samples

| Sample | Clean_paired_read | GC(%) | Q30(%) |
|--------|-------------------|-------|--------|
| N1     | 13388             | 53    | 94.46% |
| N2     | 13209             | 53    | 94.51% |
| N3     | 14359             | 53    | 94.60% |
| N4     | 13826             | 53    | 95.06% |
| N5     | 13246             | 54    | 94.59% |
| D1     | 13965             | 52    | 94.81% |
| D2     | 14348             | 52    | 94.48% |
| D3     | 13738             | 52    | 94.92% |
| D4     | 13371             | 52    | 94.30% |
| D5     | 13985             | 52    | 95.14% |
| P1     | 13983             | 52    | 94.34% |
| P2     | 14156             | 52    | 94.66% |
| P3     | 13027             | 52    | 95.87% |
| P4     | 14008             | 52    | 94.67% |
| P5     | 13433             | 52    | 94.76% |
| L1     | 13829             | 53    | 95.09% |
| L2     | 13280             | 52    | 95.10% |
| L3     | 13301             | 53    | 94.95% |
| L4     | 14371             | 53    | 94.79% |
| L5     | 13253             | 52    | 95.29% |
| PL1    | 14399             | 52    | 94.80% |
| PL2    | 13223             | 53    | 94.33% |
| PL3    | 13205             | 52    | 95.05% |
| PL4    | 14305             | 53    | 93.98% |
| PL5    | 13265             | 52    | 94.58% |
| S1     | 14023             | 52    | 95.43% |
| S2     | 13208             | 52    | 94.60% |
| S3     | 14424             | 52    | 94.57% |
| S4     | 14102             | 51    | 94.50% |
| S5     | 13759             | 52    | 95.05% |

Table S6. OTUs and Tags statistics for different samples

| SampleID | OTUs | Unique Tags |
|----------|------|-------------|
| N1       | 453  | 85538       |
| N2       | 501  | 86472       |
| N3       | 509  | 80096       |
| N4       | 549  | 77770       |
| N5       | 529  | 79431       |
| D1       | 387  | 76677       |
| D2       | 384  | 66045       |
| D3       | 385  | 75856       |
| D4       | 382  | 69363       |
| D5       | 377  | 63454       |
| S1       | 412  | 81684       |
| S2       | 406  | 66954       |
| S3       | 439  | 84477       |
| S4       | 427  | 76037       |
| S5       | 427  | 76009       |
| L1       | 405  | 85372       |
| L2       | 368  | 70476       |
| L3       | 375  | 77261       |
| L4       | 445  | 80696       |
| L5       | 421  | 74210       |
| P1       | 378  | 73547       |
| P2       | 409  | 74273       |
| P3       | 387  | 79073       |
| P4       | 373  | 73623       |
| P5       | 380  | 74329       |
| PL1      | 434  | 75324       |
| PL2      | 498  | 78428       |
| PL3      | 440  | 74568       |
| PL4      | 476  | 81726       |
| PL5      | 452  | 82010       |

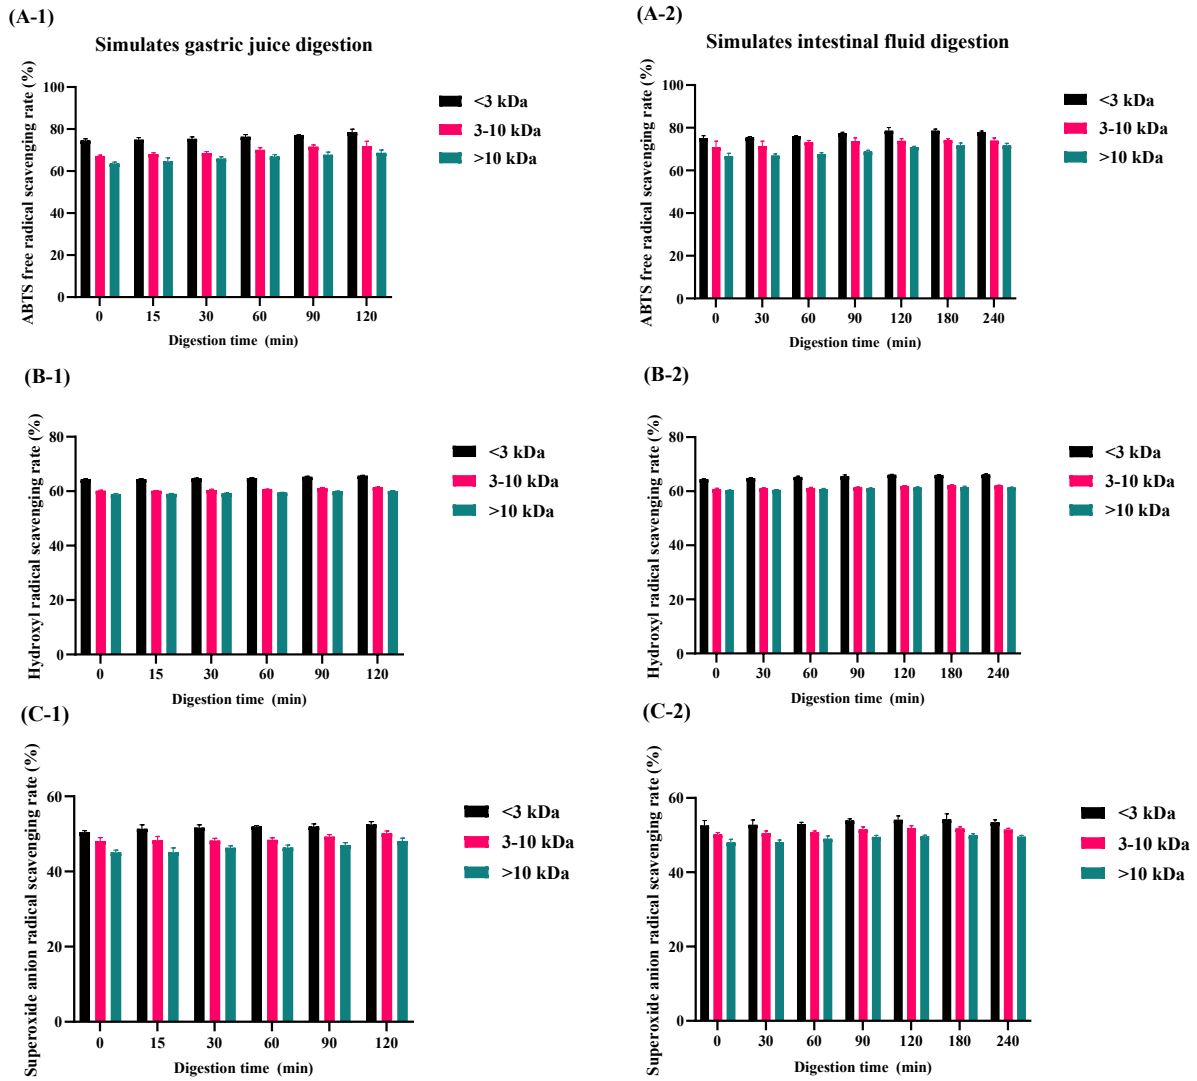

Figure S1. Effect of simulated gastrointestinal digestion on antioxidant capacity of  $\alpha$ -LA hydrolysate in vitro

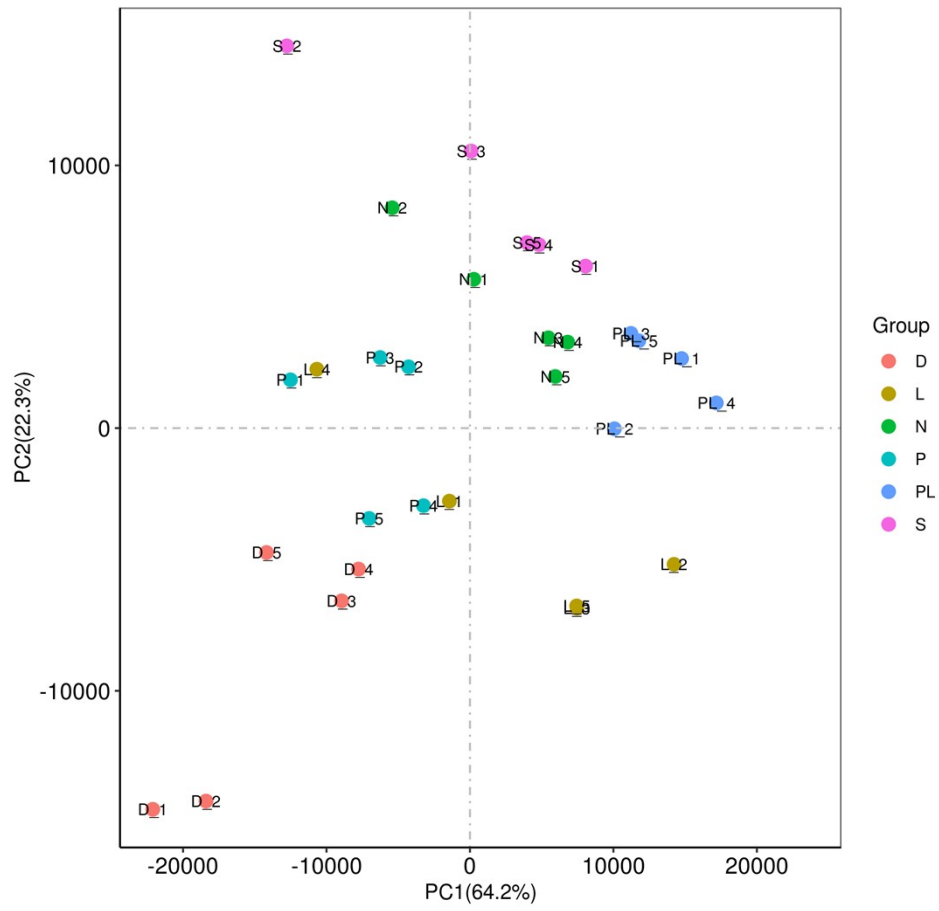

Figure S2. PCA analysis of different treatment groups



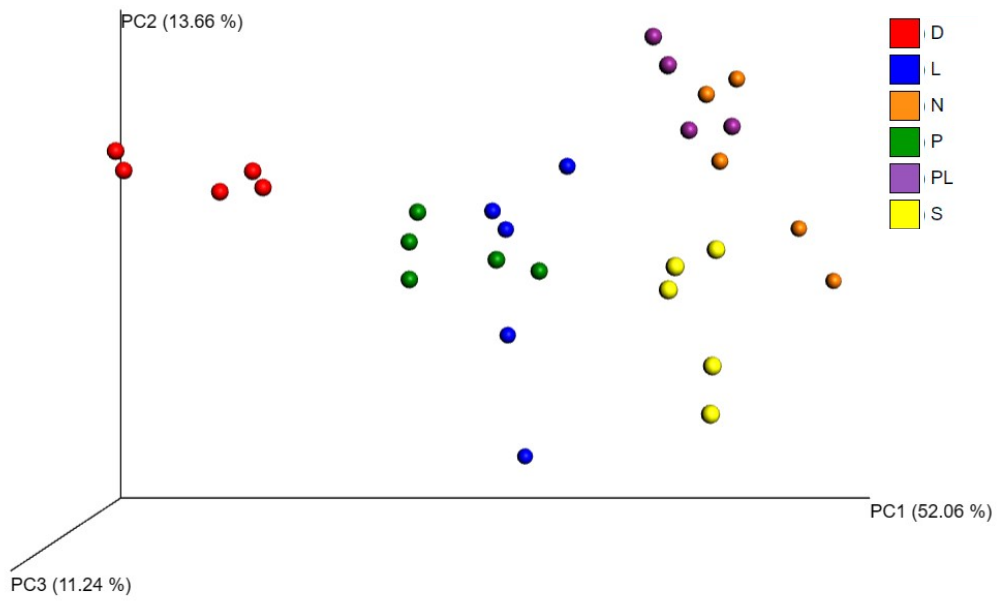

Figure S3. PCoA analysis of different treatment groups

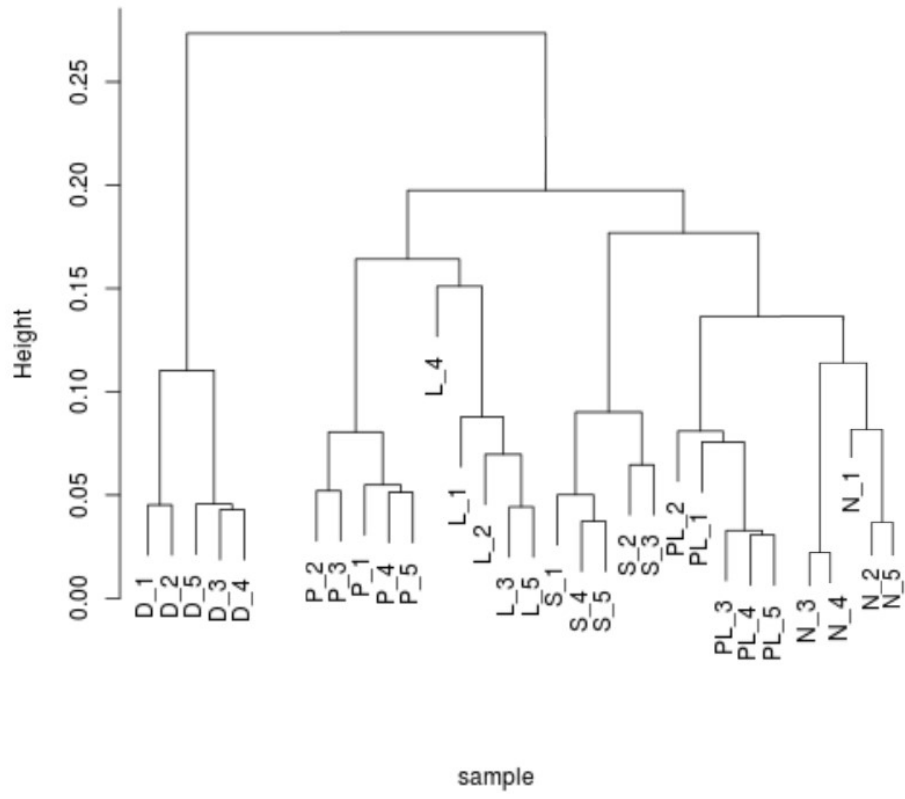

Figure S4. UPGMA clustering tree

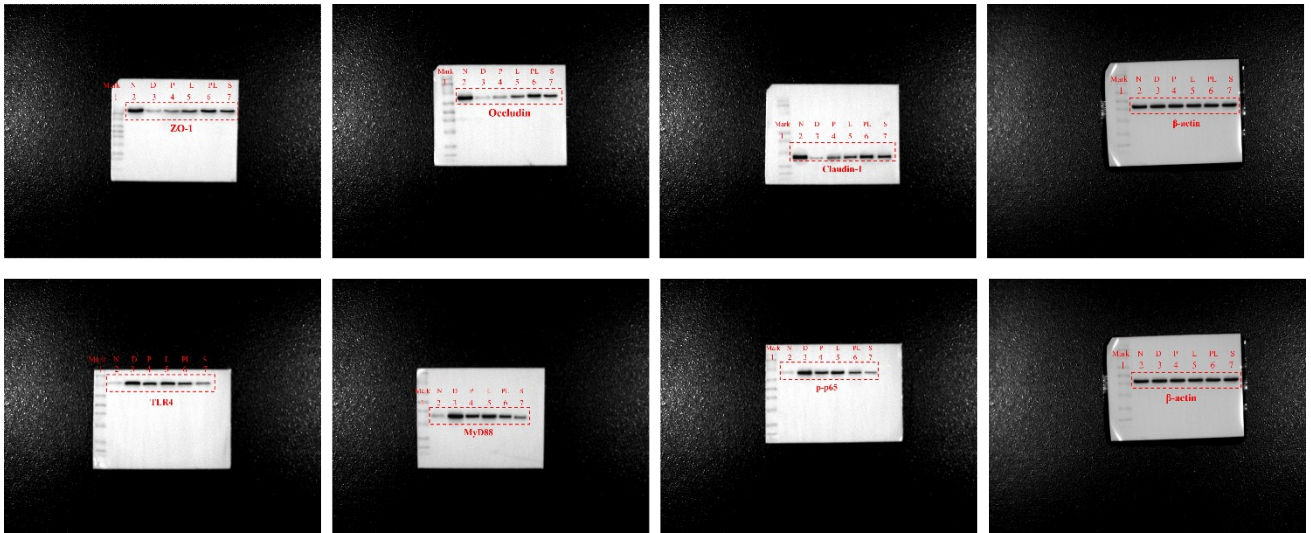

Figure S5. Raw images of the Western blot in Figure 6.
